# Supplementary material for: HIV-1 Molecular Epidemiology in Guinea-Bissau, West Africa: Origin, Demography and Migrations
Source: PLoS One. 2011 Feb 18;6(2):e17025. doi: 10.1371/journal.pone.0017025 (PMC3041826; doi:10.1371/journal.pone.0017025)
Supplement: Video S1 — Temporal dynamics of spatial HIV-1 CRF02_AG diffusion within Guinea-Bissau. (KML) [file pone.0017025.s006.kml]

<?xml version="1.0" encoding="UTF-8" standalone="no"?>
<kml xmlns="http://www.opengis.net/kml/2.2"><Document><name>sampleA_randomyear_aa_Align_ref_LosAlamos_cs_pure_new_refdating_HKY_gamma_25E6_RC_CS_migration_MCC.trees</name><open>1</open><Style id="branch24_part37_style"><LineStyle><color>ffff7887</color><width>6.20268</width></LineStyle></Style><Style id="CtoNW_part1_style"><LineStyle><color>ff0000ff</color><width>6</width></LineStyle></Style><Style id="branch24_part46_style"><LineStyle><color>ffff8679</color><width>6.75467</width></LineStyle></Style><Style id="branch26_part5_style"><LineStyle><color>ffff24db</color><width>6.13084</width></LineStyle></Style><Style id="CtoNW_part7_style"><LineStyle><color>ffff3ec1</color><width>4.3627</width></LineStyle></Style><Style id="branch26_part14_style"><LineStyle><color>ffff37c8</color><width>6.30467</width></LineStyle></Style><Style id="CtoNW_part16_style"><LineStyle><color>ffff4fb0</color><width>4.9147</width></LineStyle></Style><Style id="sn_ylw-pushpin"><IconStyle><scale>1.1</scale><Icon><href>http://maps.google.com/mapfiles/kml/pushpin/ylw-pushpin.png</href></Icon><hotSpot x="20" y="2" xunits="pixels" yunits="pixels"></hotSpot></IconStyle></Style><Style id="branch26_part23_style"><LineStyle><color>ffff4ab5</color><width>6.4785</width></LineStyle></Style><Style id="branch26_part32_style"><LineStyle><color>ffff5ea1</color><width>6.65234</width></LineStyle></Style><Style id="sn_ylw-pushpin0"><IconStyle><scale>1.1</scale><Icon><href>http://maps.google.com/mapfiles/kml/pushpin/ylw-pushpin.png</href></Icon><hotSpot x="20" y="2" xunits="pixels" yunits="pixels"></hotSpot></IconStyle></Style><Style id="branch26_part41_style"><LineStyle><color>ffff718e</color><width>6.82617</width></LineStyle></Style><Style id="CtoNW_part12_style"><LineStyle><color>ffff47b8</color><width>4.66937</width></LineStyle></Style><Style id="branch26_part50_style"><LineStyle><color>ffff857a</color><width>7</width></LineStyle></Style><Style id="CtoNW_part26_style"><LineStyle><color>ffff609f</color><width>5.52802</width></LineStyle></Style><Style id="CtoNW_part35_style"><LineStyle><color>ffff718e</color><width>6.08001</width></LineStyle></Style><Style id="CtoNW_part44_style"><LineStyle><color>ffff817e</color><width>6.63201</width></LineStyle></Style><Style id="branch24_part3_style"><LineStyle><color>ffff47b8</color><width>4.11737</width></LineStyle></Style><Style id="branch24_part12_style"><LineStyle><color>ffff54ab</color><width>4.66937</width></LineStyle></Style><Style id="branch24_part21_style"><LineStyle><color>ffff619e</color><width>5.22136</width></LineStyle></Style><StyleMap id="msn_ylw-pushpin"><Pair><key>normal</key><styleUrl>#sn_ylw-pushpin2</styleUrl></Pair><Pair><key>highlight</key><styleUrl>#sh_ylw-pushpin0</styleUrl></Pair></StyleMap><StyleMap id="msn_ylw-pushpin0"><Pair><key>normal</key><styleUrl>#sn_ylw-pushpin1</styleUrl></Pair><Pair><key>highlight</key><styleUrl>#sh_ylw-pushpin2</styleUrl></Pair></StyleMap><Style id="branch24_part30_style"><LineStyle><color>ffff6e91</color><width>5.77335</width></LineStyle></Style><Style id="branch24_part39_style"><LineStyle><color>ffff7b84</color><width>6.32534</width></LineStyle></Style><Style id="branch24_part48_style"><LineStyle><color>ffff8877</color><width>6.87734</width></LineStyle></Style><StyleMap id="CtoNW_part1_style0"><Pair><key>normal</key><styleUrl>#CtoNW_part1_style</styleUrl></Pair><Pair><key>highlight</key><styleUrl>#CtoNW_part1_style2</styleUrl></Pair></StyleMap><Style id="branch26_part7_style"><LineStyle><color>ffff28d7</color><width>6.16947</width></LineStyle></Style><Style id="sn_ylw-pushpin1"><IconStyle><scale>1.1</scale><Icon><href>http://maps.google.com/mapfiles/kml/pushpin/ylw-pushpin.png</href></Icon><hotSpot x="20" y="2" xunits="pixels" yunits="pixels"></hotSpot></IconStyle></Style><Style id="CtoNW_part9_style"><LineStyle><color>ffff42bd</color><width>4.48537</width></LineStyle></Style><Style id="branch26_part16_style"><LineStyle><color>ffff3bc4</color><width>6.3433</width></LineStyle></Style><Style id="CtoNW_part18_style"><LineStyle><color>ffff52ad</color><width>5.03736</width></LineStyle></Style><Style id="branch26_part25_style"><LineStyle><color>ffff4fb0</color><width>6.51713</width></LineStyle></Style><Style id="branch26_part34_style"><LineStyle><color>ffff629d</color><width>6.69097</width></LineStyle></Style><Style id="branch26_part43_style"><LineStyle><color>ffff758a</color><width>6.8648</width></LineStyle></Style><Style id="CtoNW_part14_style"><LineStyle><color>ffff4bb4</color><width>4.79203</width></LineStyle></Style><Style id="CtoNW_part28_style"><LineStyle><color>ffff649b</color><width>5.65069</width></LineStyle></Style><Style id="CtoNW_part37_style"><LineStyle><color>ffff748b</color><width>6.20268</width></LineStyle></Style><Style id="CtoNW_part46_style"><LineStyle><color>ffff847b</color><width>6.75467</width></LineStyle></Style><Style id="branch24_part5_style"><LineStyle><color>ffff4ab5</color><width>4.24004</width></LineStyle></Style><Style id="branch24_part14_style"><LineStyle><color>ffff57a8</color><width>4.79203</width></LineStyle></Style><Style id="branch24_part23_style"><LineStyle><color>ffff649b</color><width>5.34402</width></LineStyle></Style><Style id="branch24_part32_style"><LineStyle><color>ffff718e</color><width>5.89602</width></LineStyle></Style><Style id="branch24_part41_style"><LineStyle><color>ffff7e81</color><width>6.44801</width></LineStyle></Style><Style id="branch24_part50_style"><LineStyle><color>ffff8b74</color><width>7</width></LineStyle></Style><Style id="branch26_part9_style"><LineStyle><color>ffff2cd3</color><width>6.2081</width></LineStyle></Style><StyleMap id="msn_ylw-pushpin1"><Pair><key>normal</key><styleUrl>#sn_ylw-pushpin</styleUrl></Pair><Pair><key>highlight</key><styleUrl>#sh_ylw-pushpin</styleUrl></Pair></StyleMap><Style id="branch26_part18_style"><LineStyle><color>ffff40bf</color><width>6.38193</width></LineStyle></Style><Style id="CtoNW_part20_style"><LineStyle><color>ffff56a9</color><width>5.16003</width></LineStyle></Style><Style id="branch26_part27_style"><LineStyle><color>ffff53ac</color><width>6.55576</width></LineStyle></Style><Style id="branch26_part36_style"><LineStyle><color>ffff6699</color><width>6.72959</width></LineStyle></Style><Style id="branch26_part45_style"><LineStyle><color>ffff7a85</color><width>6.90343</width></LineStyle></Style><Style id="CtoNW_part21_style"><LineStyle><color>ffff57a8</color><width>5.22136</width></LineStyle></Style><Style id="CtoNW_part30_style"><LineStyle><color>ffff6897</color><width>5.77335</width></LineStyle></Style><Style id="CtoNW_part39_style"><LineStyle><color>ffff7887</color><width>6.32534</width></LineStyle></Style><Style id="CtoNW_part48_style"><LineStyle><color>ffff8877</color><width>6.87734</width></LineStyle></Style><Style id="branch24_part7_style"><LineStyle><color>ffff4db2</color><width>4.3627</width></LineStyle></Style><Style id="branch24_part16_style"><LineStyle><color>ffff5aa5</color><width>4.9147</width></LineStyle></Style><Style id="branch24_part25_style"><LineStyle><color>ffff6798</color><width>5.46669</width></LineStyle></Style><Style id="branch24_part34_style"><LineStyle><color>ffff748b</color><width>6.01868</width></LineStyle></Style><Style id="branch24_part43_style"><LineStyle><color>ffff817e</color><width>6.57067</width></LineStyle></Style><Style id="branch26_part2_style"><LineStyle><color>ffff1de2</color><width>6.0729</width></LineStyle></Style><Style id="branch26_part11_style"><LineStyle><color>ffff31ce</color><width>6.24673</width></LineStyle></Style><Style id="branch26_part20_style"><LineStyle><color>ffff44bb</color><width>6.42056</width></LineStyle></Style><Style id="branch26_part29_style"><LineStyle><color>ffff57a8</color><width>6.59439</width></LineStyle></Style><Style id="branch26_part38_style"><LineStyle><color>ffff6b94</color><width>6.76822</width></LineStyle></Style><Style id="branch26_part47_style"><LineStyle><color>ffff7e81</color><width>6.94206</width></LineStyle></Style><Style id="CtoNW_part23_style"><LineStyle><color>ffff5ba4</color><width>5.34402</width></LineStyle></Style><Style id="CtoNW_part32_style"><LineStyle><color>ffff6b94</color><width>5.89602</width></LineStyle></Style><Style id="CtoNW_part41_style"><LineStyle><color>ffff7b84</color><width>6.44801</width></LineStyle></Style><Style id="CtoNW_part50_style"><LineStyle><color>ffff8b74</color><width>7</width></LineStyle></Style><Style id="branch24_part9_style"><LineStyle><color>ffff50af</color><width>4.48537</width></LineStyle></Style><Style id="branch24_part18_style"><LineStyle><color>ffff5da2</color><width>5.03736</width></LineStyle></Style><Style id="branch24_part27_style"><LineStyle><color>ffff6a95</color><width>5.58935</width></LineStyle></Style><Style id="branch24_part36_style"><LineStyle><color>ffff7788</color><width>6.14135</width></LineStyle></Style><StyleMap id="msn_ylw-pushpin2"><Pair><key>normal</key><styleUrl>#sn_ylw-pushpin0</styleUrl></Pair><Pair><key>highlight</key><styleUrl>#sh_ylw-pushpin1</styleUrl></Pair></StyleMap><Style id="branch24_part45_style"><LineStyle><color>ffff847b</color><width>6.69334</width></LineStyle></Style><Style id="CtoNW_part1_style1"><LineStyle><color>ffff34cb</color><width>3.99471</width></LineStyle></Style><Style id="branch26_part4_style"><LineStyle><color>ffff22dd</color><width>6.11152</width></LineStyle></Style><Style id="CtoNW_part6_style"><LineStyle><color>ffff3dc2</color><width>4.30137</width></LineStyle></Style><Style id="branch26_part13_style"><LineStyle><color>ffff35ca</color><width>6.28536</width></LineStyle></Style><Style id="sh_ylw-pushpin"><IconStyle><scale>1.3</scale><Icon><href>http://maps.google.com/mapfiles/kml/pushpin/ylw-pushpin.png</href></Icon><hotSpot x="20" y="2" xunits="pixels" yunits="pixels"></hotSpot></IconStyle></Style><Style id="CtoNW_part15_style"><LineStyle><color>ffff4db2</color><width>4.85336</width></LineStyle></Style><Style id="branch26_part22_style"><LineStyle><color>ffff48b7</color><width>6.45919</width></LineStyle></Style><Style id="branch26_part31_style"><LineStyle><color>ffff5ca3</color><width>6.63302</width></LineStyle></Style><Style id="branch26_part40_style"><LineStyle><color>ffff6f90</color><width>6.80685</width></LineStyle></Style><Style id="CtoNW_part11_style"><LineStyle><color>ffff46b9</color><width>4.60803</width></LineStyle></Style><Style id="branch26_part49_style"><LineStyle><color>ffff827d</color><width>6.98069</width></LineStyle></Style><Style id="CtoNW_part25_style"><LineStyle><color>ffff5fa0</color><width>5.46669</width></LineStyle></Style><Style id="CtoNW_part34_style"><LineStyle><color>ffff6f90</color><width>6.01868</width></LineStyle></Style><Style id="CtoNW_part43_style"><LineStyle><color>ffff7f80</color><width>6.57067</width></LineStyle></Style><Style id="sn_ylw-pushpin2"><IconStyle><scale>1.1</scale><Icon><href>http://maps.google.com/mapfiles/kml/pushpin/ylw-pushpin.png</href></Icon><hotSpot x="20" y="2" xunits="pixels" yunits="pixels"></hotSpot></IconStyle></Style><Style id="branch24_part2_style"><LineStyle><color>ffff46b9</color><width>4.05604</width></LineStyle></Style><Style id="branch24_part11_style"><LineStyle><color>ffff53ac</color><width>4.60803</width></LineStyle></Style><Style id="branch24_part20_style"><LineStyle><color>ffff609f</color><width>5.16003</width></LineStyle></Style><Style id="branch24_part29_style"><LineStyle><color>ffff6d92</color><width>5.71202</width></LineStyle></Style><Style id="branch24_part38_style"><LineStyle><color>ffff7a85</color><width>6.26401</width></LineStyle></Style><Style id="branch24_part47_style"><LineStyle><color>ffff8778</color><width>6.816</width></LineStyle></Style><Style id="branch26_part6_style"><LineStyle><color>ffff26d9</color><width>6.15015</width></LineStyle></Style><Style id="CtoNW_part8_style"><LineStyle><color>ffff40bf</color><width>4.42404</width></LineStyle></Style><Style id="branch26_part15_style"><LineStyle><color>ffff39c6</color><width>6.32399</width></LineStyle></Style><Style id="CtoNW_part17_style"><LineStyle><color>ffff50af</color><width>4.97603</width></LineStyle></Style><Style id="branch26_part24_style"><LineStyle><color>ffff4db2</color><width>6.49782</width></LineStyle></Style><Style id="branch26_part33_style"><LineStyle><color>ffff609f</color><width>6.67165</width></LineStyle></Style><Style id="branch26_part42_style"><LineStyle><color>ffff738c</color><width>6.84548</width></LineStyle></Style><Style id="CtoNW_part13_style"><LineStyle><color>ffff49b6</color><width>4.7307</width></LineStyle></Style><Style id="CtoNW_part27_style"><LineStyle><color>ffff629d</color><width>5.58935</width></LineStyle></Style><Style id="CtoNW_part36_style"><LineStyle><color>ffff728d</color><width>6.14135</width></LineStyle></Style><Style id="CtoNW_part45_style"><LineStyle><color>ffff827d</color><width>6.69334</width></LineStyle></Style><Style id="branch24_part4_style"><LineStyle><color>ffff48b7</color><width>4.17871</width></LineStyle></Style><Style id="branch24_part13_style"><LineStyle><color>ffff56a9</color><width>4.7307</width></LineStyle></Style><Style id="branch24_part22_style"><LineStyle><color>ffff639c</color><width>5.28269</width></LineStyle></Style><Style id="branch24_part31_style"><LineStyle><color>ffff708f</color><width>5.83468</width></LineStyle></Style><Style id="branch24_part40_style"><LineStyle><color>ffff7d82</color><width>6.38668</width></LineStyle></Style><Style id="branch24_part49_style"><LineStyle><color>ffff8a75</color><width>6.93867</width></LineStyle></Style><Style id="branch26_part8_style"><LineStyle><color>ffff2ad5</color><width>6.18878</width></LineStyle></Style><Style id="CtoNW_part10_style"><LineStyle><color>ffff44bb</color><width>4.5467</width></LineStyle></Style><Style id="branch26_part17_style"><LineStyle><color>ffff3ec1</color><width>6.36262</width></LineStyle></Style><Style id="CtoNW_part19_style"><LineStyle><color>ffff54ab</color><width>5.09869</width></LineStyle></Style><Style id="branch26_part26_style"><LineStyle><color>ffff51ae</color><width>6.53645</width></LineStyle></Style><Style id="branch26_part35_style"><LineStyle><color>ffff649b</color><width>6.71028</width></LineStyle></Style><Style id="CtoNW_part1_style2"><LineStyle><color>ff0000ff</color><width>6</width></LineStyle></Style><Style id="branch26_part44_style"><LineStyle><color>ffff7887</color><width>6.88411</width></LineStyle></Style><Style id="CtoNW_part29_style"><LineStyle><color>ffff6699</color><width>5.71202</width></LineStyle></Style><Style id="CtoNW_part2_style"><LineStyle><color>ffff36c9</color><width>4.05604</width></LineStyle></Style><Style id="CtoNW_part38_style"><LineStyle><color>ffff7689</color><width>6.26401</width></LineStyle></Style><Style id="CtoNW_part47_style"><LineStyle><color>ffff8679</color><width>6.816</width></LineStyle></Style><Style id="sh_ylw-pushpin0"><IconStyle><scale>1.3</scale><Icon><href>http://maps.google.com/mapfiles/kml/pushpin/ylw-pushpin.png</href></Icon><hotSpot x="20" y="2" xunits="pixels" yunits="pixels"></hotSpot></IconStyle></Style><Style id="branch24_part6_style"><LineStyle><color>ffff4bb4</color><width>4.30137</width></LineStyle></Style><Style id="sh_ylw-pushpin1"><IconStyle><scale>1.3</scale><Icon><href>http://maps.google.com/mapfiles/kml/pushpin/ylw-pushpin.png</href></Icon><hotSpot x="20" y="2" xunits="pixels" yunits="pixels"></hotSpot></IconStyle></Style><Style id="branch24_part15_style"><LineStyle><color>ffff58a7</color><width>4.85336</width></LineStyle></Style><Style id="branch24_part24_style"><LineStyle><color>ffff6699</color><width>5.40536</width></LineStyle></Style><Style id="branch24_part33_style"><LineStyle><color>ffff738c</color><width>5.95735</width></LineStyle></Style><Style id="branch24_part42_style"><LineStyle><color>ffff807f</color><width>6.50934</width></LineStyle></Style><Style id="CtoNW_part3_style"><LineStyle><color>ffff37c8</color><width>4.11737</width></LineStyle></Style><Style id="branch26_part1_style"><LineStyle><color>ffff1be4</color><width>6.05358</width></LineStyle></Style><Style id="branch26_part10_style"><LineStyle><color>ffff2ed1</color><width>6.22741</width></LineStyle></Style><Style id="sh_ylw-pushpin2"><IconStyle><scale>1.3</scale><Icon><href>http://maps.google.com/mapfiles/kml/pushpin/ylw-pushpin.png</href></Icon><hotSpot x="20" y="2" xunits="pixels" yunits="pixels"></hotSpot></IconStyle></Style><Style id="branch26_part19_style"><LineStyle><color>ffff42bd</color><width>6.40124</width></LineStyle></Style><Style id="branch26_part28_style"><LineStyle><color>ffff55aa</color><width>6.57508</width></LineStyle></Style><Style id="branch26_part37_style"><LineStyle><color>ffff6996</color><width>6.74891</width></LineStyle></Style><Style id="branch26_part46_style"><LineStyle><color>ffff7c83</color><width>6.92274</width></LineStyle></Style><Style id="CtoNW_part22_style"><LineStyle><color>ffff59a6</color><width>5.28269</width></LineStyle></Style><Style id="CtoNW_part31_style"><LineStyle><color>ffff6996</color><width>5.83468</width></LineStyle></Style><Style id="CtoNW_part40_style"><LineStyle><color>ffff7986</color><width>6.38668</width></LineStyle></Style><Style id="CtoNW_part4_style"><LineStyle><color>ffff39c6</color><width>4.17871</width></LineStyle></Style><Style id="CtoNW_part49_style"><LineStyle><color>ffff8a75</color><width>6.93867</width></LineStyle></Style><Style id="branch24_part8_style"><LineStyle><color>ffff4eb1</color><width>4.42404</width></LineStyle></Style><Style id="branch24_part17_style"><LineStyle><color>ffff5ba4</color><width>4.97603</width></LineStyle></Style><Style id="branch24_part26_style"><LineStyle><color>ffff6897</color><width>5.52802</width></LineStyle></Style><Style id="branch24_part35_style"><LineStyle><color>ffff7689</color><width>6.08001</width></LineStyle></Style><Style id="branch24_part44_style"><LineStyle><color>ffff837c</color><width>6.63201</width></LineStyle></Style><Style id="branch26_part3_style"><LineStyle><color>ffff1fe0</color><width>6.09221</width></LineStyle></Style><Style id="CtoNW_part5_style"><LineStyle><color>ffff3bc4</color><width>4.24004</width></LineStyle></Style><Style id="branch26_part12_style"><LineStyle><color>ffff33cc</color><width>6.26604</width></LineStyle></Style><Style id="branch26_part21_style"><LineStyle><color>ffff46b9</color><width>6.43987</width></LineStyle></Style><Style id="branch26_part30_style"><LineStyle><color>ffff5aa5</color><width>6.61371</width></LineStyle></Style><Style id="branch26_part39_style"><LineStyle><color>ffff6d92</color><width>6.78754</width></LineStyle></Style><Style id="branch26_part48_style"><LineStyle><color>ffff807f</color><width>6.96137</width></LineStyle></Style><Style id="CtoNW_part24_style"><LineStyle><color>ffff5da2</color><width>5.40536</width></LineStyle></Style><Style id="CtoNW_part33_style"><LineStyle><color>ffff6d92</color><width>5.95735</width></LineStyle></Style><Style id="CtoNW_part42_style"><LineStyle><color>ffff7d82</color><width>6.50934</width></LineStyle></Style><Style id="branch24_part1_style"><LineStyle><color>ffff44bb</color><width>3.99471</width></LineStyle></Style><Style id="branch24_part10_style"><LineStyle><color>ffff51ae</color><width>4.5467</width></LineStyle></Style><Style id="branch24_part19_style"><LineStyle><color>ffff5ea1</color><width>5.09869</width></LineStyle></Style><Style id="branch24_part28_style"><LineStyle><color>ffff6b94</color><width>5.65069</width></LineStyle></Style><Folder><name>branches</name><description>branches on which the state changes</description><Folder><name>CtoNW</name><Placemark><name>CtoNW_part1</name><TimeSpan><begin>1994-01-01</begin></TimeSpan><styleUrl>#CtoNW_part1_style0</styleUrl><LineString><tessellate>1</tessellate><altitudeMode>absolute</altitudeMode><coordinates>-16.123,12.199,0 -16.1125,12.1923,1185.852954540424</coordinates></LineString></Placemark><Placemark><name>CtoNW_part2</name><TimeSpan><begin>1993-09-11</begin></TimeSpan><styleUrl>#CtoNW_part1_style0</styleUrl><LineString><tessellate>1</tessellate><altitudeMode>absolute</altitudeMode><coordinates>-16.1125,12.1923,1185.852954540424 -16.102,12.1856,1659.848370626224</coordinates></LineString></Placemark><Placemark><name>CtoNW_part3</name><TimeSpan><begin>1993-05-22</begin></TimeSpan><styleUrl>#CtoNW_part1_style0</styleUrl><LineString><tessellate>1</tessellate><altitudeMode>absolute</altitudeMode><coordinates>-16.102,12.1856,1659.848370626224 -16.0915,12.1789,2011.603378162516</coordinates></LineString></Placemark><Placemark><name>CtoNW_part4</name><TimeSpan><begin>1993-01-30</begin></TimeSpan><styleUrl>#CtoNW_part1_style0</styleUrl><LineString><tessellate>1</tessellate><altitudeMode>absolute</altitudeMode><coordinates>-16.0915,12.1789,2011.603378162516 -16.081,12.1722,2297.956014044914</coordinates></LineString></Placemark><Placemark><name>CtoNW_part5</name><TimeSpan><begin>1992-10-10</begin></TimeSpan><styleUrl>#CtoNW_part1_style0</styleUrl><LineString><tessellate>1</tessellate><altitudeMode>absolute</altitudeMode><coordinates>-16.081,12.1722,2297.956014044914 -16.0705,12.1655,2541.113474015192</coordinates></LineString></Placemark><Placemark><name>CtoNW_part6</name><TimeSpan><begin>1992-06-20</begin></TimeSpan><styleUrl>#CtoNW_part1_style0</styleUrl><LineString><tessellate>1</tessellate><altitudeMode>absolute</altitudeMode><coordinates>-16.0705,12.1655,2541.113474015192 -16.06,12.1588,2752.547127124977</coordinates></LineString></Placemark><Placemark><name>CtoNW_part7</name><TimeSpan><begin>1992-03-01</begin></TimeSpan><styleUrl>#CtoNW_part1_style0</styleUrl><LineString><tessellate>1</tessellate><altitudeMode>absolute</altitudeMode><coordinates>-16.06,12.1588,2752.547127124977 -16.0495,12.1521,2939.11140315443</coordinates></LineString></Placemark><Placemark><name>CtoNW_part8</name><TimeSpan><begin>1991-11-10</begin></TimeSpan><styleUrl>#CtoNW_part1_style0</styleUrl><LineString><tessellate>1</tessellate><altitudeMode>absolute</altitudeMode><coordinates>-16.0495,12.1521,2939.11140315443 -16.039,12.1454,3105.291958439152</coordinates></LineString></Placemark><Placemark><name>CtoNW_part9</name><TimeSpan><begin>1991-07-21</begin></TimeSpan><styleUrl>#CtoNW_part1_style0</styleUrl><LineString><tessellate>1</tessellate><altitudeMode>absolute</altitudeMode><coordinates>-16.039,12.1454,3105.291958439152 -16.0285,12.1387,3254.213055106773</coordinates></LineString></Placemark><Placemark><name>CtoNW_part10</name><TimeSpan><begin>1991-03-31</begin></TimeSpan><styleUrl>#CtoNW_part1_style0</styleUrl><LineString><tessellate>1</tessellate><altitudeMode>absolute</altitudeMode><coordinates>-16.0285,12.1387,3254.213055106773 -16.018,12.132,3388.151298686924</coordinates></LineString></Placemark><Placemark><name>CtoNW_part11</name><TimeSpan><begin>1990-12-09</begin></TimeSpan><styleUrl>#CtoNW_part1_style0</styleUrl><LineString><tessellate>1</tessellate><altitudeMode>absolute</altitudeMode><coordinates>-16.018,12.132,3388.151298686924 -16.0075,12.1253,3508.822878323504</coordinates></LineString></Placemark><Placemark><name>CtoNW_part12</name><TimeSpan><begin>1990-08-20</begin></TimeSpan><styleUrl>#CtoNW_part1_style0</styleUrl><LineString><tessellate>1</tessellate><altitudeMode>absolute</altitudeMode><coordinates>-16.0075,12.1253,3508.822878323504 -15.997,12.1186,3617.555654580179</coordinates></LineString></Placemark><Placemark><name>CtoNW_part13</name><TimeSpan><begin>1990-04-30</begin></TimeSpan><styleUrl>#CtoNW_part1_style0</styleUrl><LineString><tessellate>1</tessellate><altitudeMode>absolute</altitudeMode><coordinates>-15.997,12.1186,3617.555654580179 -15.9865,12.1119,3715.397958551634</coordinates></LineString></Placemark><Placemark><name>CtoNW_part14</name><TimeSpan><begin>1990-01-08</begin></TimeSpan><styleUrl>#CtoNW_part1_style0</styleUrl><LineString><tessellate>1</tessellate><altitudeMode>absolute</altitudeMode><coordinates>-15.9865,12.1119,3715.397958551634 -15.976,12.1052,3803.190400271895</coordinates></LineString></Placemark><Placemark><name>CtoNW_part15</name><TimeSpan><begin>1989-09-18</begin></TimeSpan><styleUrl>#CtoNW_part1_style0</styleUrl><LineString><tessellate>1</tessellate><altitudeMode>absolute</altitudeMode><coordinates>-15.976,12.1052,3803.190400271895 -15.9655,12.0985,3881.614948048939</coordinates></LineString></Placemark><Placemark><name>CtoNW_part16</name><TimeSpan><begin>1989-05-29</begin></TimeSpan><styleUrl>#CtoNW_part1_style0</styleUrl><LineString><tessellate>1</tessellate><altitudeMode>absolute</altitudeMode><coordinates>-15.9655,12.0985,3881.614948048939 -15.955,12.0918,3951.229447020216</coordinates></LineString></Placemark><Placemark><name>CtoNW_part17</name><TimeSpan><begin>1989-02-06</begin></TimeSpan><styleUrl>#CtoNW_part1_style0</styleUrl><LineString><tessellate>1</tessellate><altitudeMode>absolute</altitudeMode><coordinates>-15.955,12.0918,3951.229447020216 -15.9445,12.0851,4012.492471640094</coordinates></LineString></Placemark><Placemark><name>CtoNW_part18</name><TimeSpan><begin>1988-10-18</begin></TimeSpan><styleUrl>#CtoNW_part1_style0</styleUrl><LineString><tessellate>1</tessellate><altitudeMode>absolute</altitudeMode><coordinates>-15.9445,12.0851,4012.492471640094 -15.934,12.0784,4065.781558424308</coordinates></LineString></Placemark><Placemark><name>CtoNW_part19</name><TimeSpan><begin>1988-06-28</begin></TimeSpan><styleUrl>#CtoNW_part1_style0</styleUrl><LineString><tessellate>1</tessellate><altitudeMode>absolute</altitudeMode><coordinates>-15.934,12.0784,4065.781558424308 -15.9235,12.0717,4111.406776343591</coordinates></LineString></Placemark><Placemark><name>CtoNW_part20</name><TimeSpan><begin>1988-03-08</begin></TimeSpan><styleUrl>#CtoNW_part1_style0</styleUrl><LineString><tessellate>1</tessellate><altitudeMode>absolute</altitudeMode><coordinates>-15.9235,12.0717,4111.406776343591 -15.913,12.065,4149.620926565561</coordinates></LineString></Placemark><Placemark><name>CtoNW_part21</name><TimeSpan><begin>1987-11-17</begin></TimeSpan><styleUrl>#CtoNW_part1_style0</styleUrl><LineString><tessellate>1</tessellate><altitudeMode>absolute</altitudeMode><coordinates>-15.913,12.065,4149.620926565561 -15.9025,12.0583,4180.627242616075</coordinates></LineString></Placemark><Placemark><name>CtoNW_part22</name><TimeSpan><begin>1987-07-28</begin></TimeSpan><styleUrl>#CtoNW_part1_style0</styleUrl><LineString><tessellate>1</tessellate><altitudeMode>absolute</altitudeMode><coordinates>-15.9025,12.0583,4180.627242616075 -15.892,12.0516,4204.58518799448</coordinates></LineString></Placemark><Placemark><name>CtoNW_part23</name><TimeSpan><begin>1987-04-08</begin></TimeSpan><styleUrl>#CtoNW_part1_style0</styleUrl><LineString><tessellate>1</tessellate><altitudeMode>absolute</altitudeMode><coordinates>-15.892,12.0516,4204.58518799448 -15.8815,12.0449,4221.61476432745</coordinates></LineString></Placemark><Placemark><name>CtoNW_part24</name><TimeSpan><begin>1986-12-17</begin></TimeSpan><styleUrl>#CtoNW_part1_style0</styleUrl><LineString><tessellate>1</tessellate><altitudeMode>absolute</altitudeMode><coordinates>-15.8815,12.0449,4221.61476432745 -15.871,12.0382,4231.799615714154</coordinates></LineString></Placemark><Placemark><name>CtoNW_part25</name><TimeSpan><begin>1986-08-27</begin></TimeSpan><styleUrl>#CtoNW_part1_style0</styleUrl><LineString><tessellate>1</tessellate><altitudeMode>absolute</altitudeMode><coordinates>-15.871,12.0382,4231.799615714154 -15.8605,12.0315,4235.189123358654</coordinates></LineString></Placemark><Placemark><name>CtoNW_part26</name><TimeSpan><begin>1986-05-07</begin></TimeSpan><styleUrl>#CtoNW_part1_style0</styleUrl><LineString><tessellate>1</tessellate><altitudeMode>absolute</altitudeMode><coordinates>-15.8605,12.0315,4235.189123358654 -15.85,12.0248,4231.799615714154</coordinates></LineString></Placemark><Placemark><name>CtoNW_part27</name><TimeSpan><begin>1986-01-15</begin></TimeSpan><styleUrl>#CtoNW_part1_style0</styleUrl><LineString><tessellate>1</tessellate><altitudeMode>absolute</altitudeMode><coordinates>-15.85,12.0248,4231.799615714154 -15.8395,12.0181,4221.61476432745</coordinates></LineString></Placemark><Placemark><name>CtoNW_part28</name><TimeSpan><begin>1985-09-25</begin></TimeSpan><styleUrl>#CtoNW_part1_style0</styleUrl><LineString><tessellate>1</tessellate><altitudeMode>absolute</altitudeMode><coordinates>-15.8395,12.0181,4221.61476432745 -15.829,12.0114,4204.58518799448</coordinates></LineString></Placemark><Placemark><name>CtoNW_part29</name><TimeSpan><begin>1985-06-06</begin></TimeSpan><styleUrl>#CtoNW_part1_style0</styleUrl><LineString><tessellate>1</tessellate><altitudeMode>absolute</altitudeMode><coordinates>-15.829,12.0114,4204.58518799448 -15.8185,12.0047,4180.627242616076</coordinates></LineString></Placemark><Placemark><name>CtoNW_part30</name><TimeSpan><begin>1985-02-14</begin></TimeSpan><styleUrl>#CtoNW_part1_style0</styleUrl><LineString><tessellate>1</tessellate><altitudeMode>absolute</altitudeMode><coordinates>-15.8185,12.0047,4180.627242616076 -15.808,11.998,4149.620926565561</coordinates></LineString></Placemark><Placemark><name>CtoNW_part31</name><TimeSpan><begin>1984-10-25</begin></TimeSpan><styleUrl>#CtoNW_part1_style0</styleUrl><LineString><tessellate>1</tessellate><altitudeMode>absolute</altitudeMode><coordinates>-15.808,11.998,4149.620926565561 -15.7975,11.9913,4111.406776343591</coordinates></LineString></Placemark><Placemark><name>CtoNW_part32</name><TimeSpan><begin>1984-07-05</begin></TimeSpan><styleUrl>#CtoNW_part1_style0</styleUrl><LineString><tessellate>1</tessellate><altitudeMode>absolute</altitudeMode><coordinates>-15.7975,11.9913,4111.406776343591 -15.787,11.9846,4065.781558424308</coordinates></LineString></Placemark><Placemark><name>CtoNW_part33</name><TimeSpan><begin>1984-03-15</begin></TimeSpan><styleUrl>#CtoNW_part1_style0</styleUrl><LineString><tessellate>1</tessellate><altitudeMode>absolute</altitudeMode><coordinates>-15.787,11.9846,4065.781558424308 -15.7765,11.9779,4012.492471640093</coordinates></LineString></Placemark><Placemark><name>CtoNW_part34</name><TimeSpan><begin>1983-11-25</begin></TimeSpan><styleUrl>#CtoNW_part1_style0</styleUrl><LineString><tessellate>1</tessellate><altitudeMode>absolute</altitudeMode><coordinates>-15.7765,11.9779,4012.492471640093 -15.766,11.9712,3951.229447020216</coordinates></LineString></Placemark><Placemark><name>CtoNW_part35</name><TimeSpan><begin>1983-08-05</begin></TimeSpan><styleUrl>#CtoNW_part1_style0</styleUrl><LineString><tessellate>1</tessellate><altitudeMode>absolute</altitudeMode><coordinates>-15.766,11.9712,3951.229447020216 -15.7555,11.9645,3881.614948048939</coordinates></LineString></Placemark><Placemark><name>CtoNW_part36</name><TimeSpan><begin>1983-04-15</begin></TimeSpan><styleUrl>#CtoNW_part1_style0</styleUrl><LineString><tessellate>1</tessellate><altitudeMode>absolute</altitudeMode><coordinates>-15.7555,11.9645,3881.614948048939 -15.745,11.9578,3803.190400271895</coordinates></LineString></Placemark><Placemark><name>CtoNW_part37</name><TimeSpan><begin>1982-12-24</begin></TimeSpan><styleUrl>#CtoNW_part1_style0</styleUrl><LineString><tessellate>1</tessellate><altitudeMode>absolute</altitudeMode><coordinates>-15.745,11.9578,3803.190400271895 -15.7345,11.9511,3715.397958551634</coordinates></LineString></Placemark><Placemark><name>CtoNW_part38</name><TimeSpan><begin>1982-09-03</begin></TimeSpan><styleUrl>#CtoNW_part1_style0</styleUrl><LineString><tessellate>1</tessellate><altitudeMode>absolute</altitudeMode><coordinates>-15.7345,11.9511,3715.397958551634 -15.724,11.9444,3617.555654580179</coordinates></LineString></Placemark><Placemark><name>CtoNW_part39</name><TimeSpan><begin>1982-05-14</begin></TimeSpan><styleUrl>#CtoNW_part1_style0</styleUrl><LineString><tessellate>1</tessellate><altitudeMode>absolute</altitudeMode><coordinates>-15.724,11.9444,3617.555654580179 -15.7135,11.9377,3508.822878323504</coordinates></LineString></Placemark><Placemark><name>CtoNW_part40</name><TimeSpan><begin>1982-01-23</begin></TimeSpan><styleUrl>#CtoNW_part1_style0</styleUrl><LineString><tessellate>1</tessellate><altitudeMode>absolute</altitudeMode><coordinates>-15.7135,11.9377,3508.822878323504 -15.703,11.931,3388.151298686923</coordinates></LineString></Placemark><Placemark><name>CtoNW_part41</name><TimeSpan><begin>1981-10-03</begin></TimeSpan><styleUrl>#CtoNW_part1_style0</styleUrl><LineString><tessellate>1</tessellate><altitudeMode>absolute</altitudeMode><coordinates>-15.703,11.931,3388.151298686923 -15.6925,11.9243,3254.213055106773</coordinates></LineString></Placemark><Placemark><name>CtoNW_part42</name><TimeSpan><begin>1981-06-13</begin></TimeSpan><styleUrl>#CtoNW_part1_style0</styleUrl><LineString><tessellate>1</tessellate><altitudeMode>absolute</altitudeMode><coordinates>-15.6925,11.9243,3254.213055106773 -15.682,11.9176,3105.291958439152</coordinates></LineString></Placemark><Placemark><name>CtoNW_part43</name><TimeSpan><begin>1981-02-21</begin></TimeSpan><styleUrl>#CtoNW_part1_style0</styleUrl><LineString><tessellate>1</tessellate><altitudeMode>absolute</altitudeMode><coordinates>-15.682,11.9176,3105.291958439152 -15.6715,11.9109,2939.11140315443</coordinates></LineString></Placemark><Placemark><name>CtoNW_part44</name><TimeSpan><begin>1980-11-01</begin></TimeSpan><styleUrl>#CtoNW_part1_style0</styleUrl><LineString><tessellate>1</tessellate><altitudeMode>absolute</altitudeMode><coordinates>-15.6715,11.9109,2939.11140315443 -15.661,11.9042,2752.547127124977</coordinates></LineString></Placemark><Placemark><name>CtoNW_part45</name><TimeSpan><begin>1980-07-13</begin></TimeSpan><styleUrl>#CtoNW_part1_style0</styleUrl><LineString><tessellate>1</tessellate><altitudeMode>absolute</altitudeMode><coordinates>-15.661,11.9042,2752.547127124977 -15.6505,11.8975,2541.113474015192</coordinates></LineString></Placemark><Placemark><name>CtoNW_part46</name><TimeSpan><begin>1980-03-23</begin></TimeSpan><styleUrl>#CtoNW_part1_style0</styleUrl><LineString><tessellate>1</tessellate><altitudeMode>absolute</altitudeMode><coordinates>-15.6505,11.8975,2541.113474015192 -15.64,11.8908,2297.956014044913</coordinates></LineString></Placemark><Placemark><name>CtoNW_part47</name><TimeSpan><begin>1979-12-02</begin></TimeSpan><styleUrl>#CtoNW_part1_style0</styleUrl><LineString><tessellate>1</tessellate><altitudeMode>absolute</altitudeMode><coordinates>-15.64,11.8908,2297.956014044913 -15.6295,11.8841,2011.603378162515</coordinates></LineString></Placemark><Placemark><name>CtoNW_part48</name><TimeSpan><begin>1979-08-12</begin></TimeSpan><styleUrl>#CtoNW_part1_style0</styleUrl><LineString><tessellate>1</tessellate><altitudeMode>absolute</altitudeMode><coordinates>-15.6295,11.8841,2011.603378162515 -15.619,11.8774,1659.848370626226</coordinates></LineString></Placemark><Placemark><name>CtoNW_part49</name><TimeSpan><begin>1979-04-22</begin></TimeSpan><styleUrl>#CtoNW_part1_style0</styleUrl><LineString><tessellate>1</tessellate><altitudeMode>absolute</altitudeMode><coordinates>-15.619,11.8774,1659.848370626226 -15.6085,11.8707,1185.852954540424</coordinates></LineString></Placemark><Placemark><name>CtoNW_part50</name><TimeSpan><begin>1979-01-01</begin></TimeSpan><styleUrl>#CtoNW_part1_style0</styleUrl><LineString><tessellate>1</tessellate><altitudeMode>absolute</altitudeMode><coordinates>-15.6085,11.8707,1185.852954540424 -15.598,11.864,5.18661080370486e-013</coordinates></LineString></Placemark></Folder><Folder><name>CtoS</name><Placemark><name>CtoS_part1</name><TimeSpan><begin>1998-01-01</begin></TimeSpan><styleUrl>#CtoNW_part1_style0</styleUrl><LineString><tessellate>1</tessellate><altitudeMode>absolute</altitudeMode><coordinates>-14.875,11.31,0 -14.88946,11.32108,1739.254383336632</coordinates></LineString></Placemark><Placemark><name>CtoS_part2</name><TimeSpan><begin>1997-09-18</begin></TimeSpan><styleUrl>#CtoNW_part1_style0</styleUrl><LineString><tessellate>1</tessellate><altitudeMode>absolute</altitudeMode><coordinates>-14.88946,11.32108,1739.254383336632 -14.90392,11.33216,2434.449012613576</coordinates></LineString></Placemark><Placemark><name>CtoS_part3</name><TimeSpan><begin>1997-06-06</begin></TimeSpan><styleUrl>#CtoNW_part1_style0</styleUrl><LineString><tessellate>1</tessellate><altitudeMode>absolute</altitudeMode><coordinates>-14.90392,11.33216,2434.449012613576 -14.91838,11.34324,2950.357360588476</coordinates></LineString></Placemark><Placemark><name>CtoS_part4</name><TimeSpan><begin>1997-02-21</begin></TimeSpan><styleUrl>#CtoNW_part1_style0</styleUrl><LineString><tessellate>1</tessellate><altitudeMode>absolute</altitudeMode><coordinates>-14.91838,11.34324,2950.357360588476 -14.93284,11.35432,3370.34204353888</coordinates></LineString></Placemark><Placemark><name>CtoS_part5</name><TimeSpan><begin>1996-11-09</begin></TimeSpan><styleUrl>#CtoNW_part1_style0</styleUrl><LineString><tessellate>1</tessellate><altitudeMode>absolute</altitudeMode><coordinates>-14.93284,11.35432,3370.34204353888 -14.9473,11.3654,3726.973678578494</coordinates></LineString></Placemark><Placemark><name>CtoS_part6</name><TimeSpan><begin>1996-07-28</begin></TimeSpan><styleUrl>#CtoNW_part1_style0</styleUrl><LineString><tessellate>1</tessellate><altitudeMode>absolute</altitudeMode><coordinates>-14.9473,11.3654,3726.973678578494 -14.96176,11.37648,4037.076973045206</coordinates></LineString></Placemark><Placemark><name>CtoS_part7</name><TimeSpan><begin>1996-04-14</begin></TimeSpan><styleUrl>#CtoNW_part1_style0</styleUrl><LineString><tessellate>1</tessellate><altitudeMode>absolute</altitudeMode><coordinates>-14.96176,11.37648,4037.076973045206 -14.97622,11.38756,4310.705110172887</coordinates></LineString></Placemark><Placemark><name>CtoS_part8</name><TimeSpan><begin>1996-01-01</begin></TimeSpan><styleUrl>#CtoNW_part1_style0</styleUrl><LineString><tessellate>1</tessellate><altitudeMode>absolute</altitudeMode><coordinates>-14.97622,11.38756,4310.705110172887 -14.99068,11.39864,4554.437065385058</coordinates></LineString></Placemark><Placemark><name>CtoS_part9</name><TimeSpan><begin>1995-09-19</begin></TimeSpan><styleUrl>#CtoNW_part1_style0</styleUrl><LineString><tessellate>1</tessellate><altitudeMode>absolute</altitudeMode><coordinates>-14.99068,11.39864,4554.437065385058 -15.00514,11.40972,4772.855098716044</coordinates></LineString></Placemark><Placemark><name>CtoS_part10</name><TimeSpan><begin>1995-06-06</begin></TimeSpan><styleUrl>#CtoNW_part1_style0</styleUrl><LineString><tessellate>1</tessellate><altitudeMode>absolute</altitudeMode><coordinates>-15.00514,11.40972,4772.855098716044 -15.0196,11.4208,4969.29823810466</coordinates></LineString></Placemark><Placemark><name>CtoS_part11</name><TimeSpan><begin>1995-02-22</begin></TimeSpan><styleUrl>#CtoNW_part1_style0</styleUrl><LineString><tessellate>1</tessellate><altitudeMode>absolute</altitudeMode><coordinates>-15.0196,11.4208,4969.29823810466 -15.03406,11.43188,5146.2835658584</coordinates></LineString></Placemark><Placemark><name>CtoS_part12</name><TimeSpan><begin>1994-11-09</begin></TimeSpan><styleUrl>#CtoNW_part1_style0</styleUrl><LineString><tessellate>1</tessellate><altitudeMode>absolute</altitudeMode><coordinates>-15.03406,11.43188,5146.2835658584 -15.04852,11.44296,5305.758614592477</coordinates></LineString></Placemark><Placemark><name>CtoS_part13</name><TimeSpan><begin>1994-07-28</begin></TimeSpan><styleUrl>#CtoNW_part1_style0</styleUrl><LineString><tessellate>1</tessellate><altitudeMode>absolute</altitudeMode><coordinates>-15.04852,11.44296,5305.758614592477 -15.06298,11.45404,5449.260939570077</coordinates></LineString></Placemark><Placemark><name>CtoS_part14</name><TimeSpan><begin>1994-04-15</begin></TimeSpan><styleUrl>#CtoNW_part1_style0</styleUrl><LineString><tessellate>1</tessellate><altitudeMode>absolute</altitudeMode><coordinates>-15.06298,11.45404,5449.260939570077 -15.07744,11.46512,5578.023437906109</coordinates></LineString></Placemark><Placemark><name>CtoS_part15</name><TimeSpan><begin>1993-12-31</begin></TimeSpan><styleUrl>#CtoNW_part1_style0</styleUrl><LineString><tessellate>1</tessellate><altitudeMode>absolute</altitudeMode><coordinates>-15.07744,11.46512,5578.023437906109 -15.0919,11.4762,5693.046331731323</coordinates></LineString></Placemark><Placemark><name>CtoS_part16</name><TimeSpan><begin>1993-09-18</begin></TimeSpan><styleUrl>#CtoNW_part1_style0</styleUrl><LineString><tessellate>1</tessellate><altitudeMode>absolute</altitudeMode><coordinates>-15.0919,11.4762,5693.046331731323 -15.10636,11.48728,5795.147795505555</coordinates></LineString></Placemark><Placemark><name>CtoS_part17</name><TimeSpan><begin>1993-06-06</begin></TimeSpan><styleUrl>#CtoNW_part1_style0</styleUrl><LineString><tessellate>1</tessellate><altitudeMode>absolute</altitudeMode><coordinates>-15.10636,11.48728,5795.147795505555 -15.12082,11.49836,5885.000406403569</coordinates></LineString></Placemark><Placemark><name>CtoS_part18</name><TimeSpan><begin>1993-02-21</begin></TimeSpan><styleUrl>#CtoNW_part1_style0</styleUrl><LineString><tessellate>1</tessellate><altitudeMode>absolute</altitudeMode><coordinates>-15.12082,11.49836,5885.000406403569 -15.13528,11.50944,5963.157885725592</coordinates></LineString></Placemark><Placemark><name>CtoS_part19</name><TimeSpan><begin>1992-11-09</begin></TimeSpan><styleUrl>#CtoNW_part1_style0</styleUrl><LineString><tessellate>1</tessellate><altitudeMode>absolute</altitudeMode><coordinates>-15.13528,11.50944,5963.157885725592 -15.14974,11.52052,6030.075002180013</coordinates></LineString></Placemark><Placemark><name>CtoS_part20</name><TimeSpan><begin>1992-07-28</begin></TimeSpan><styleUrl>#CtoNW_part1_style0</styleUrl><LineString><tessellate>1</tessellate><altitudeMode>absolute</altitudeMode><coordinates>-15.14974,11.52052,6030.075002180013 -15.1642,11.5316,6086.122531533941</coordinates></LineString></Placemark><Placemark><name>CtoS_part21</name><TimeSpan><begin>1992-04-14</begin></TimeSpan><styleUrl>#CtoNW_part1_style0</styleUrl><LineString><tessellate>1</tessellate><altitudeMode>absolute</altitudeMode><coordinates>-15.1642,11.5316,6086.122531533941 -15.17866,11.54268,6131.59855020514</coordinates></LineString></Placemark><Placemark><name>CtoS_part22</name><TimeSpan><begin>1992-01-01</begin></TimeSpan><styleUrl>#CtoNW_part1_style0</styleUrl><LineString><tessellate>1</tessellate><altitudeMode>absolute</altitudeMode><coordinates>-15.17866,11.54268,6131.59855020514 -15.19312,11.55376,6166.736938447619</coordinates></LineString></Placemark><Placemark><name>CtoS_part23</name><TimeSpan><begin>1991-09-18</begin></TimeSpan><styleUrl>#CtoNW_part1_style0</styleUrl><LineString><tessellate>1</tessellate><altitudeMode>absolute</altitudeMode><coordinates>-15.19312,11.55376,6166.736938447619 -15.20758,11.56484,6191.713698989537</coordinates></LineString></Placemark><Placemark><name>CtoS_part24</name><TimeSpan><begin>1991-06-06</begin></TimeSpan><styleUrl>#CtoNW_part1_style0</styleUrl><LineString><tessellate>1</tessellate><altitudeMode>absolute</altitudeMode><coordinates>-15.20758,11.56484,6191.713698989537 -15.22204,11.57592,6206.651510081656</coordinates></LineString></Placemark><Placemark><name>CtoS_part25</name><TimeSpan><begin>1991-02-22</begin></TimeSpan><styleUrl>#CtoNW_part1_style0</styleUrl><LineString><tessellate>1</tessellate><altitudeMode>absolute</altitudeMode><coordinates>-15.22204,11.57592,6206.651510081656 -15.2365,11.587,6211.622797630825</coordinates></LineString></Placemark><Placemark><name>CtoS_part26</name><TimeSpan><begin>1990-11-09</begin></TimeSpan><styleUrl>#CtoNW_part1_style0</styleUrl><LineString><tessellate>1</tessellate><altitudeMode>absolute</altitudeMode><coordinates>-15.2365,11.587,6211.622797630825 -15.25096,11.59808,6206.651510081656</coordinates></LineString></Placemark><Placemark><name>CtoS_part27</name><TimeSpan><begin>1990-07-28</begin></TimeSpan><styleUrl>#CtoNW_part1_style0</styleUrl><LineString><tessellate>1</tessellate><altitudeMode>absolute</altitudeMode><coordinates>-15.25096,11.59808,6206.651510081656 -15.26542,11.60916,6191.713698989537</coordinates></LineString></Placemark><Placemark><name>CtoS_part28</name><TimeSpan><begin>1990-04-15</begin></TimeSpan><styleUrl>#CtoNW_part1_style0</styleUrl><LineString><tessellate>1</tessellate><altitudeMode>absolute</altitudeMode><coordinates>-15.26542,11.60916,6191.713698989537 -15.27988,11.62024,6166.736938447619</coordinates></LineString></Placemark><Placemark><name>CtoS_part29</name><TimeSpan><begin>1989-12-31</begin></TimeSpan><styleUrl>#CtoNW_part1_style0</styleUrl><LineString><tessellate>1</tessellate><altitudeMode>absolute</altitudeMode><coordinates>-15.27988,11.62024,6166.736938447619 -15.29434,11.63132,6131.598550205141</coordinates></LineString></Placemark><Placemark><name>CtoS_part30</name><TimeSpan><begin>1989-09-18</begin></TimeSpan><styleUrl>#CtoNW_part1_style0</styleUrl><LineString><tessellate>1</tessellate><altitudeMode>absolute</altitudeMode><coordinates>-15.29434,11.63132,6131.598550205141 -15.3088,11.6424,6086.122531533941</coordinates></LineString></Placemark><Placemark><name>CtoS_part31</name><TimeSpan><begin>1989-06-05</begin></TimeSpan><styleUrl>#CtoNW_part1_style0</styleUrl><LineString><tessellate>1</tessellate><altitudeMode>absolute</altitudeMode><coordinates>-15.3088,11.6424,6086.122531533941 -15.32326,11.65348,6030.075002180013</coordinates></LineString></Placemark><Placemark><name>CtoS_part32</name><TimeSpan><begin>1989-02-21</begin></TimeSpan><styleUrl>#CtoNW_part1_style0</styleUrl><LineString><tessellate>1</tessellate><altitudeMode>absolute</altitudeMode><coordinates>-15.32326,11.65348,6030.075002180013 -15.33772,11.66456,5963.157885725592</coordinates></LineString></Placemark><Placemark><name>CtoS_part33</name><TimeSpan><begin>1988-11-09</begin></TimeSpan><styleUrl>#CtoNW_part1_style0</styleUrl><LineString><tessellate>1</tessellate><altitudeMode>absolute</altitudeMode><coordinates>-15.33772,11.66456,5963.157885725592 -15.35218,11.67564,5885.000406403568</coordinates></LineString></Placemark><Placemark><name>CtoS_part34</name><TimeSpan><begin>1988-07-27</begin></TimeSpan><styleUrl>#CtoNW_part1_style0</styleUrl><LineString><tessellate>1</tessellate><altitudeMode>absolute</altitudeMode><coordinates>-15.35218,11.67564,5885.000406403568 -15.36664,11.68672,5795.147795505555</coordinates></LineString></Placemark><Placemark><name>CtoS_part35</name><TimeSpan><begin>1988-04-14</begin></TimeSpan><styleUrl>#CtoNW_part1_style0</styleUrl><LineString><tessellate>1</tessellate><altitudeMode>absolute</altitudeMode><coordinates>-15.36664,11.68672,5795.147795505555 -15.3811,11.6978,5693.046331731322</coordinates></LineString></Placemark><Placemark><name>CtoS_part36</name><TimeSpan><begin>1988-01-01</begin></TimeSpan><styleUrl>#CtoNW_part1_style0</styleUrl><LineString><tessellate>1</tessellate><altitudeMode>absolute</altitudeMode><coordinates>-15.3811,11.6978,5693.046331731322 -15.39556,11.70888,5578.02343790611</coordinates></LineString></Placemark><Placemark><name>CtoS_part37</name><TimeSpan><begin>1987-09-18</begin></TimeSpan><styleUrl>#CtoNW_part1_style0</styleUrl><LineString><tessellate>1</tessellate><altitudeMode>absolute</altitudeMode><coordinates>-15.39556,11.70888,5578.02343790611 -15.41002,11.71996,5449.260939570077</coordinates></LineString></Placemark><Placemark><name>CtoS_part38</name><TimeSpan><begin>1987-06-06</begin></TimeSpan><styleUrl>#CtoNW_part1_style0</styleUrl><LineString><tessellate>1</tessellate><altitudeMode>absolute</altitudeMode><coordinates>-15.41002,11.71996,5449.260939570077 -15.42448,11.73104,5305.758614592477</coordinates></LineString></Placemark><Placemark><name>CtoS_part39</name><TimeSpan><begin>1987-02-22</begin></TimeSpan><styleUrl>#CtoNW_part1_style0</styleUrl><LineString><tessellate>1</tessellate><altitudeMode>absolute</altitudeMode><coordinates>-15.42448,11.73104,5305.758614592477 -15.43894,11.74212,5146.2835658584</coordinates></LineString></Placemark><Placemark><name>CtoS_part40</name><TimeSpan><begin>1986-11-09</begin></TimeSpan><styleUrl>#CtoNW_part1_style0</styleUrl><LineString><tessellate>1</tessellate><altitudeMode>absolute</altitudeMode><coordinates>-15.43894,11.74212,5146.2835658584 -15.4534,11.7532,4969.298238104659</coordinates></LineString></Placemark><Placemark><name>CtoS_part41</name><TimeSpan><begin>1986-07-28</begin></TimeSpan><styleUrl>#CtoNW_part1_style0</styleUrl><LineString><tessellate>1</tessellate><altitudeMode>absolute</altitudeMode><coordinates>-15.4534,11.7532,4969.298238104659 -15.46786,11.76428,4772.855098716044</coordinates></LineString></Placemark><Placemark><name>CtoS_part42</name><TimeSpan><begin>1986-04-14</begin></TimeSpan><styleUrl>#CtoNW_part1_style0</styleUrl><LineString><tessellate>1</tessellate><altitudeMode>absolute</altitudeMode><coordinates>-15.46786,11.76428,4772.855098716044 -15.48232,11.77536,4554.437065385058</coordinates></LineString></Placemark><Placemark><name>CtoS_part43</name><TimeSpan><begin>1985-12-31</begin></TimeSpan><styleUrl>#CtoNW_part1_style0</styleUrl><LineString><tessellate>1</tessellate><altitudeMode>absolute</altitudeMode><coordinates>-15.48232,11.77536,4554.437065385058 -15.49678,11.78644,4310.705110172887</coordinates></LineString></Placemark><Placemark><name>CtoS_part44</name><TimeSpan><begin>1985-09-18</begin></TimeSpan><styleUrl>#CtoNW_part1_style0</styleUrl><LineString><tessellate>1</tessellate><altitudeMode>absolute</altitudeMode><coordinates>-15.49678,11.78644,4310.705110172887 -15.51124,11.79752,4037.076973045206</coordinates></LineString></Placemark><Placemark><name>CtoS_part45</name><TimeSpan><begin>1985-06-05</begin></TimeSpan><styleUrl>#CtoNW_part1_style0</styleUrl><LineString><tessellate>1</tessellate><altitudeMode>absolute</altitudeMode><coordinates>-15.51124,11.79752,4037.076973045206 -15.5257,11.8086,3726.973678578494</coordinates></LineString></Placemark><Placemark><name>CtoS_part46</name><TimeSpan><begin>1985-02-21</begin></TimeSpan><styleUrl>#CtoNW_part1_style0</styleUrl><LineString><tessellate>1</tessellate><altitudeMode>absolute</altitudeMode><coordinates>-15.5257,11.8086,3726.973678578494 -15.54016,11.81968,3370.342043538879</coordinates></LineString></Placemark><Placemark><name>CtoS_part47</name><TimeSpan><begin>1984-11-09</begin></TimeSpan><styleUrl>#CtoNW_part1_style0</styleUrl><LineString><tessellate>1</tessellate><altitudeMode>absolute</altitudeMode><coordinates>-15.54016,11.81968,3370.342043538879 -15.55462,11.83076,2950.357360588476</coordinates></LineString></Placemark><Placemark><name>CtoS_part48</name><TimeSpan><begin>1984-07-27</begin></TimeSpan><styleUrl>#CtoNW_part1_style0</styleUrl><LineString><tessellate>1</tessellate><altitudeMode>absolute</altitudeMode><coordinates>-15.55462,11.83076,2950.357360588476 -15.56908,11.84184,2434.449012613578</coordinates></LineString></Placemark><Placemark><name>CtoS_part49</name><TimeSpan><begin>1984-04-14</begin></TimeSpan><styleUrl>#CtoNW_part1_style0</styleUrl><LineString><tessellate>1</tessellate><altitudeMode>absolute</altitudeMode><coordinates>-15.56908,11.84184,2434.449012613578 -15.58354,11.85292,1739.254383336633</coordinates></LineString></Placemark><Placemark><name>CtoS_part50</name><TimeSpan><begin>1984-01-01</begin></TimeSpan><styleUrl>#CtoNW_part1_style0</styleUrl><LineString><tessellate>1</tessellate><altitudeMode>absolute</altitudeMode><coordinates>-15.58354,11.85292,1739.254383336633 -15.598,11.864,7.607043976629316e-013</coordinates></LineString></Placemark></Folder><Folder><name>CtoNE</name><Placemark><name>CtoNE_part1</name><TimeSpan><begin>2001-01-01</begin></TimeSpan><styleUrl>#CtoNW_part1_style0</styleUrl><LineString><tessellate>1</tessellate><altitudeMode>absolute</altitudeMode><coordinates>-14.227,12.276,0 -14.25442,12.26776,2712.891313800437</coordinates></LineString></Placemark><Placemark><name>CtoNE_part2</name><TimeSpan><begin>2000-07-21</begin></TimeSpan><styleUrl>#CtoNW_part1_style0</styleUrl><LineString><tessellate>1</tessellate><altitudeMode>absolute</altitudeMode><coordinates>-14.25442,12.26776,2712.891313800437 -14.28184,12.25952,3797.256826536998</coordinates></LineString></Placemark><Placemark><name>CtoNE_part3</name><TimeSpan><begin>2000-02-08</begin></TimeSpan><styleUrl>#CtoNW_part1_style0</styleUrl><LineString><tessellate>1</tessellate><altitudeMode>absolute</altitudeMode><coordinates>-14.28184,12.25952,3797.256826536998 -14.30926,12.25128,4601.971357860015</coordinates></LineString></Placemark><Placemark><name>CtoNE_part4</name><TimeSpan><begin>1999-08-28</begin></TimeSpan><styleUrl>#CtoNW_part1_style0</styleUrl><LineString><tessellate>1</tessellate><altitudeMode>absolute</altitudeMode><coordinates>-14.30926,12.25128,4601.971357860015 -14.33668,12.24304,5257.064028156799</coordinates></LineString></Placemark><Placemark><name>CtoNE_part5</name><TimeSpan><begin>1999-03-17</begin></TimeSpan><styleUrl>#CtoNW_part1_style0</styleUrl><LineString><tessellate>1</tessellate><altitudeMode>absolute</altitudeMode><coordinates>-14.33668,12.24304,5257.064028156799 -14.3641,12.2348,5813.338529572361</coordinates></LineString></Placemark><Placemark><name>CtoNE_part6</name><TimeSpan><begin>1998-10-04</begin></TimeSpan><styleUrl>#CtoNW_part1_style0</styleUrl><LineString><tessellate>1</tessellate><altitudeMode>absolute</altitudeMode><coordinates>-14.3641,12.2348,5813.338529572361 -14.39152,12.22656,6297.038063119442</coordinates></LineString></Placemark><Placemark><name>CtoNE_part7</name><TimeSpan><begin>1998-04-23</begin></TimeSpan><styleUrl>#CtoNW_part1_style0</styleUrl><LineString><tessellate>1</tessellate><altitudeMode>absolute</altitudeMode><coordinates>-14.39152,12.22656,6297.038063119442 -14.41894,12.21832,6723.843597454783</coordinates></LineString></Placemark><Placemark><name>CtoNE_part8</name><TimeSpan><begin>1997-11-10</begin></TimeSpan><styleUrl>#CtoNW_part1_style0</styleUrl><LineString><tessellate>1</tessellate><altitudeMode>absolute</altitudeMode><coordinates>-14.41894,12.21832,6723.843597454783 -14.44636,12.21008,7104.01702724497</coordinates></LineString></Placemark><Placemark><name>CtoNE_part9</name><TimeSpan><begin>1997-05-30</begin></TimeSpan><styleUrl>#CtoNW_part1_style0</styleUrl><LineString><tessellate>1</tessellate><altitudeMode>absolute</altitudeMode><coordinates>-14.44636,12.21008,7104.01702724497 -14.47378,12.20184,7444.705767821407</coordinates></LineString></Placemark><Placemark><name>CtoNE_part10</name><TimeSpan><begin>1996-12-17</begin></TimeSpan><styleUrl>#CtoNW_part1_style0</styleUrl><LineString><tessellate>1</tessellate><altitudeMode>absolute</altitudeMode><coordinates>-14.47378,12.20184,7444.705767821407 -14.5012,12.1936,7751.118039429817</coordinates></LineString></Placemark><Placemark><name>CtoNE_part11</name><TimeSpan><begin>1996-07-06</begin></TimeSpan><styleUrl>#CtoNW_part1_style0</styleUrl><LineString><tessellate>1</tessellate><altitudeMode>absolute</altitudeMode><coordinates>-14.5012,12.1936,7751.118039429817 -14.52862,12.18536,8027.179990420638</coordinates></LineString></Placemark><Placemark><name>CtoNE_part12</name><TimeSpan><begin>1996-01-24</begin></TimeSpan><styleUrl>#CtoNW_part1_style0</styleUrl><LineString><tessellate>1</tessellate><altitudeMode>absolute</altitudeMode><coordinates>-14.52862,12.18536,8027.179990420638 -14.55604,12.17712,8275.929384772368</coordinates></LineString></Placemark><Placemark><name>CtoNE_part13</name><TimeSpan><begin>1995-08-13</begin></TimeSpan><styleUrl>#CtoNW_part1_style0</styleUrl><LineString><tessellate>1</tessellate><altitudeMode>absolute</altitudeMode><coordinates>-14.55604,12.17712,8275.929384772368 -14.58346,12.16888,8499.764503241377</coordinates></LineString></Placemark><Placemark><name>CtoNE_part14</name><TimeSpan><begin>1995-03-02</begin></TimeSpan><styleUrl>#CtoNW_part1_style0</styleUrl><LineString><tessellate>1</tessellate><altitudeMode>absolute</altitudeMode><coordinates>-14.58346,12.16888,8499.764503241377 -14.61088,12.16064,8700.608420396799</coordinates></LineString></Placemark><Placemark><name>CtoNE_part15</name><TimeSpan><begin>1994-09-19</begin></TimeSpan><styleUrl>#CtoNW_part1_style0</styleUrl><LineString><tessellate>1</tessellate><altitudeMode>absolute</altitudeMode><coordinates>-14.61088,12.16064,8700.608420396799 -14.6383,12.1524,8880.021284056209</coordinates></LineString></Placemark><Placemark><name>CtoNE_part16</name><TimeSpan><begin>1994-04-08</begin></TimeSpan><styleUrl>#CtoNW_part1_style0</styleUrl><LineString><tessellate>1</tessellate><altitudeMode>absolute</altitudeMode><coordinates>-14.6383,12.1524,8880.021284056209 -14.66572,12.14416,9039.279283836577</coordinates></LineString></Placemark><Placemark><name>CtoNE_part17</name><TimeSpan><begin>1993-10-26</begin></TimeSpan><styleUrl>#CtoNW_part1_style0</styleUrl><LineString><tessellate>1</tessellate><altitudeMode>absolute</altitudeMode><coordinates>-14.66572,12.14416,9039.279283836577 -14.69314,12.13592,9179.431506514824</coordinates></LineString></Placemark><Placemark><name>CtoNE_part18</name><TimeSpan><begin>1993-05-15</begin></TimeSpan><styleUrl>#CtoNW_part1_style0</styleUrl><LineString><tessellate>1</tessellate><altitudeMode>absolute</altitudeMode><coordinates>-14.69314,12.13592,9179.431506514824 -14.72056,12.12768,9301.34164731578</coordinates></LineString></Placemark><Placemark><name>CtoNE_part19</name><TimeSpan><begin>1992-12-02</begin></TimeSpan><styleUrl>#CtoNW_part1_style0</styleUrl><LineString><tessellate>1</tessellate><altitudeMode>absolute</altitudeMode><coordinates>-14.72056,12.12768,9301.34164731578 -14.74798,12.11944,9405.719055079158</coordinates></LineString></Placemark><Placemark><name>CtoNE_part20</name><TimeSpan><begin>1992-06-21</begin></TimeSpan><styleUrl>#CtoNW_part1_style0</styleUrl><LineString><tessellate>1</tessellate><altitudeMode>absolute</altitudeMode><coordinates>-14.74798,12.11944,9405.719055079158 -14.7754,12.1112,9493.142066342496</coordinates></LineString></Placemark><Placemark><name>CtoNE_part21</name><TimeSpan><begin>1992-01-09</begin></TimeSpan><styleUrl>#CtoNW_part1_style0</styleUrl><LineString><tessellate>1</tessellate><altitudeMode>absolute</altitudeMode><coordinates>-14.7754,12.1112,9493.142066342496 -14.80282,12.10296,9564.075621100972</coordinates></LineString></Placemark><Placemark><name>CtoNE_part22</name><TimeSpan><begin>1991-07-29</begin></TimeSpan><styleUrl>#CtoNW_part1_style0</styleUrl><LineString><tessellate>1</tessellate><altitudeMode>absolute</altitudeMode><coordinates>-14.80282,12.10296,9564.075621100972 -14.83024,12.09472,9618.884526087653</coordinates></LineString></Placemark><Placemark><name>CtoNE_part23</name><TimeSpan><begin>1991-02-15</begin></TimeSpan><styleUrl>#CtoNW_part1_style0</styleUrl><LineString><tessellate>1</tessellate><altitudeMode>absolute</altitudeMode><coordinates>-14.83024,12.09472,9618.884526087653 -14.85766,12.08648,9657.843310593371</coordinates></LineString></Placemark><Placemark><name>CtoNE_part24</name><TimeSpan><begin>1990-09-04</begin></TimeSpan><styleUrl>#CtoNW_part1_style0</styleUrl><LineString><tessellate>1</tessellate><altitudeMode>absolute</altitudeMode><coordinates>-14.85766,12.08648,9657.843310593371 -14.88508,12.07824,9681.143328317785</coordinates></LineString></Placemark><Placemark><name>CtoNE_part25</name><TimeSpan><begin>1990-03-24</begin></TimeSpan><styleUrl>#CtoNW_part1_style0</styleUrl><LineString><tessellate>1</tessellate><altitudeMode>absolute</altitudeMode><coordinates>-14.88508,12.07824,9681.143328317785 -14.9125,12.07,9688.897549287271</coordinates></LineString></Placemark><Placemark><name>CtoNE_part26</name><TimeSpan><begin>1989-10-11</begin></TimeSpan><styleUrl>#CtoNW_part1_style0</styleUrl><LineString><tessellate>1</tessellate><altitudeMode>absolute</altitudeMode><coordinates>-14.9125,12.07,9688.897549287271 -14.93992,12.06176,9681.143328317785</coordinates></LineString></Placemark><Placemark><name>CtoNE_part27</name><TimeSpan><begin>1989-04-30</begin></TimeSpan><styleUrl>#CtoNW_part1_style0</styleUrl><LineString><tessellate>1</tessellate><altitudeMode>absolute</altitudeMode><coordinates>-14.93992,12.06176,9681.143328317785 -14.96734,12.05352,9657.843310593371</coordinates></LineString></Placemark><Placemark><name>CtoNE_part28</name><TimeSpan><begin>1988-11-17</begin></TimeSpan><styleUrl>#CtoNW_part1_style0</styleUrl><LineString><tessellate>1</tessellate><altitudeMode>absolute</altitudeMode><coordinates>-14.96734,12.05352,9657.843310593371 -14.99476,12.04528,9618.884526087653</coordinates></LineString></Placemark><Placemark><name>CtoNE_part29</name><TimeSpan><begin>1988-06-06</begin></TimeSpan><styleUrl>#CtoNW_part1_style0</styleUrl><LineString><tessellate>1</tessellate><altitudeMode>absolute</altitudeMode><coordinates>-14.99476,12.04528,9618.884526087653 -15.02218,12.03704,9564.075621100972</coordinates></LineString></Placemark><Placemark><name>CtoNE_part30</name><TimeSpan><begin>1987-12-25</begin></TimeSpan><styleUrl>#CtoNW_part1_style0</styleUrl><LineString><tessellate>1</tessellate><altitudeMode>absolute</altitudeMode><coordinates>-15.02218,12.03704,9564.075621100972 -15.0496,12.0288,9493.142066342496</coordinates></LineString></Placemark><Placemark><name>CtoNE_part31</name><TimeSpan><begin>1987-07-14</begin></TimeSpan><styleUrl>#CtoNW_part1_style0</styleUrl><LineString><tessellate>1</tessellate><altitudeMode>absolute</altitudeMode><coordinates>-15.0496,12.0288,9493.142066342496 -15.07702,12.02056,9405.719055079158</coordinates></LineString></Placemark><Placemark><name>CtoNE_part32</name><TimeSpan><begin>1987-01-31</begin></TimeSpan><styleUrl>#CtoNW_part1_style0</styleUrl><LineString><tessellate>1</tessellate><altitudeMode>absolute</altitudeMode><coordinates>-15.07702,12.02056,9405.719055079158 -15.10444,12.01232,9301.34164731578</coordinates></LineString></Placemark><Placemark><name>CtoNE_part33</name><TimeSpan><begin>1986-08-20</begin></TimeSpan><styleUrl>#CtoNW_part1_style0</styleUrl><LineString><tessellate>1</tessellate><altitudeMode>absolute</altitudeMode><coordinates>-15.10444,12.01232,9301.34164731578 -15.13186,12.00408,9179.431506514824</coordinates></LineString></Placemark><Placemark><name>CtoNE_part34</name><TimeSpan><begin>1986-03-09</begin></TimeSpan><styleUrl>#CtoNW_part1_style0</styleUrl><LineString><tessellate>1</tessellate><altitudeMode>absolute</altitudeMode><coordinates>-15.13186,12.00408,9179.431506514824 -15.15928,11.99584,9039.279283836577</coordinates></LineString></Placemark><Placemark><name>CtoNE_part35</name><TimeSpan><begin>1985-09-26</begin></TimeSpan><styleUrl>#CtoNW_part1_style0</styleUrl><LineString><tessellate>1</tessellate><altitudeMode>absolute</altitudeMode><coordinates>-15.15928,11.99584,9039.279283836577 -15.1867,11.9876,8880.021284056209</coordinates></LineString></Placemark><Placemark><name>CtoNE_part36</name><TimeSpan><begin>1985-04-15</begin></TimeSpan><styleUrl>#CtoNW_part1_style0</styleUrl><LineString><tessellate>1</tessellate><altitudeMode>absolute</altitudeMode><coordinates>-15.1867,11.9876,8880.021284056209 -15.21412,11.97936,8700.608420396799</coordinates></LineString></Placemark><Placemark><name>CtoNE_part37</name><TimeSpan><begin>1984-11-02</begin></TimeSpan><styleUrl>#CtoNW_part1_style0</styleUrl><LineString><tessellate>1</tessellate><altitudeMode>absolute</altitudeMode><coordinates>-15.21412,11.97936,8700.608420396799 -15.24154,11.97112,8499.764503241377</coordinates></LineString></Placemark><Placemark><name>CtoNE_part38</name><TimeSpan><begin>1984-05-22</begin></TimeSpan><styleUrl>#CtoNW_part1_style0</styleUrl><LineString><tessellate>1</tessellate><altitudeMode>absolute</altitudeMode><coordinates>-15.24154,11.97112,8499.764503241377 -15.26896,11.96288,8275.929384772368</coordinates></LineString></Placemark><Placemark><name>CtoNE_part39</name><TimeSpan><begin>1983-12-10</begin></TimeSpan><styleUrl>#CtoNW_part1_style0</styleUrl><LineString><tessellate>1</tessellate><altitudeMode>absolute</altitudeMode><coordinates>-15.26896,11.96288,8275.929384772368 -15.29638,11.95464,8027.179990420638</coordinates></LineString></Placemark><Placemark><name>CtoNE_part40</name><TimeSpan><begin>1983-06-29</begin></TimeSpan><styleUrl>#CtoNW_part1_style0</styleUrl><LineString><tessellate>1</tessellate><altitudeMode>absolute</altitudeMode><coordinates>-15.29638,11.95464,8027.179990420638 -15.3238,11.9464,7751.118039429814</coordinates></LineString></Placemark><Placemark><name>CtoNE_part41</name><TimeSpan><begin>1983-01-16</begin></TimeSpan><styleUrl>#CtoNW_part1_style0</styleUrl><LineString><tessellate>1</tessellate><altitudeMode>absolute</altitudeMode><coordinates>-15.3238,11.9464,7751.118039429814 -15.35122,11.93816,7444.705767821407</coordinates></LineString></Placemark><Placemark><name>CtoNE_part42</name><TimeSpan><begin>1982-08-05</begin></TimeSpan><styleUrl>#CtoNW_part1_style0</styleUrl><LineString><tessellate>1</tessellate><altitudeMode>absolute</altitudeMode><coordinates>-15.35122,11.93816,7444.705767821407 -15.37864,11.92992,7104.01702724497</coordinates></LineString></Placemark><Placemark><name>CtoNE_part43</name><TimeSpan><begin>1982-02-22</begin></TimeSpan><styleUrl>#CtoNW_part1_style0</styleUrl><LineString><tessellate>1</tessellate><altitudeMode>absolute</altitudeMode><coordinates>-15.37864,11.92992,7104.01702724497 -15.40606,11.92168,6723.843597454785</coordinates></LineString></Placemark><Placemark><name>CtoNE_part44</name><TimeSpan><begin>1981-09-11</begin></TimeSpan><styleUrl>#CtoNW_part1_style0</styleUrl><LineString><tessellate>1</tessellate><altitudeMode>absolute</altitudeMode><coordinates>-15.40606,11.92168,6723.843597454785 -15.43348,11.91344,6297.038063119442</coordinates></LineString></Placemark><Placemark><name>CtoNE_part45</name><TimeSpan><begin>1981-03-31</begin></TimeSpan><styleUrl>#CtoNW_part1_style0</styleUrl><LineString><tessellate>1</tessellate><altitudeMode>absolute</altitudeMode><coordinates>-15.43348,11.91344,6297.038063119442 -15.4609,11.9052,5813.338529572363</coordinates></LineString></Placemark><Placemark><name>CtoNE_part46</name><TimeSpan><begin>1980-10-18</begin></TimeSpan><styleUrl>#CtoNW_part1_style0</styleUrl><LineString><tessellate>1</tessellate><altitudeMode>absolute</altitudeMode><coordinates>-15.4609,11.9052,5813.338529572363 -15.48832,11.89696,5257.064028156798</coordinates></LineString></Placemark><Placemark><name>CtoNE_part47</name><TimeSpan><begin>1980-05-07</begin></TimeSpan><styleUrl>#CtoNW_part1_style0</styleUrl><LineString><tessellate>1</tessellate><altitudeMode>absolute</altitudeMode><coordinates>-15.48832,11.89696,5257.064028156798 -15.51574,11.88872,4601.971357860015</coordinates></LineString></Placemark><Placemark><name>CtoNE_part48</name><TimeSpan><begin>1979-11-25</begin></TimeSpan><styleUrl>#CtoNW_part1_style0</styleUrl><LineString><tessellate>1</tessellate><altitudeMode>absolute</altitudeMode><coordinates>-15.51574,11.88872,4601.971357860015 -15.54316,11.88048,3797.256826537002</coordinates></LineString></Placemark><Placemark><name>CtoNE_part49</name><TimeSpan><begin>1979-06-14</begin></TimeSpan><styleUrl>#CtoNW_part1_style0</styleUrl><LineString><tessellate>1</tessellate><altitudeMode>absolute</altitudeMode><coordinates>-15.54316,11.88048,3797.256826537002 -15.57058,11.87224,2712.891313800439</coordinates></LineString></Placemark><Placemark><name>CtoNE_part50</name><TimeSpan><begin>1979-01-01</begin></TimeSpan><styleUrl>#CtoNW_part1_style0</styleUrl><LineString><tessellate>1</tessellate><altitudeMode>absolute</altitudeMode><coordinates>-15.57058,11.87224,2712.891313800439 -15.598,11.864,1.186547737100129e-012</coordinates></LineString></Placemark></Folder></Folder><Placemark><name>Bissau</name><LookAt><TimeStamp xmlns="http://www.google.com/kml/ext/2.2"><when xmlns="http://www.opengis.net/kml/2.2">2001</when></TimeStamp><longitude>-15.175</longitude><latitude>11.793</latitude><altitude>0</altitude><range>196594.6286000541</range><tilt>0</tilt><heading>3.061283880908635e-014</heading><altitudeMode>relativeToGround</altitudeMode><altitudeMode xmlns="http://www.google.com/kml/ext/2.2">relativeToSeaFloor</altitudeMode></LookAt><styleUrl>#msn_ylw-pushpin1</styleUrl><Point><coordinates>-15.59798509091772,11.86402730345745,0</coordinates></Point></Placemark><Placemark><name>Northwest</name><LookAt><TimeStamp xmlns="http://www.google.com/kml/ext/2.2"><when xmlns="http://www.opengis.net/kml/2.2">2001</when></TimeStamp><longitude>-15.175</longitude><latitude>11.793</latitude><altitude>0</altitude><range>196594.6286000541</range><tilt>0</tilt><heading>3.061283880908635e-014</heading><altitudeMode>relativeToGround</altitudeMode><altitudeMode xmlns="http://www.google.com/kml/ext/2.2">relativeToSeaFloor</altitudeMode></LookAt><styleUrl>#msn_ylw-pushpin2</styleUrl><Point><coordinates>-16.12514397826699,12.19738340008641,0</coordinates></Point></Placemark><Placemark><name>Northeast</name><LookAt><TimeStamp xmlns="http://www.google.com/kml/ext/2.2"><when xmlns="http://www.opengis.net/kml/2.2">2001</when></TimeStamp><longitude>-14.67023209441174</longitude><latitude>12.04711639847133</latitude><altitude>0</altitude><range>196594.6286000477</range><tilt>0</tilt><heading>0.1036446191968341</heading><altitudeMode>relativeToGround</altitudeMode><altitudeMode xmlns="http://www.google.com/kml/ext/2.2">relativeToSeaFloor</altitudeMode></LookAt><styleUrl>#msn_ylw-pushpin</styleUrl><Point><coordinates>-14.22801506648269,12.27416788019364,0</coordinates></Point></Placemark><Placemark><name>South</name><LookAt><TimeStamp xmlns="http://www.google.com/kml/ext/2.2"><when xmlns="http://www.opengis.net/kml/2.2">2001</when></TimeStamp><longitude>-14.74529750600769</longitude><latitude>11.48504618258234</latitude><altitude>0</altitude><range>196594.6286000496</range><tilt>0</tilt><heading>0.08450300122434823</heading><altitudeMode>relativeToGround</altitudeMode><altitudeMode xmlns="http://www.google.com/kml/ext/2.2">relativeToSeaFloor</altitudeMode></LookAt><styleUrl>#msn_ylw-pushpin0</styleUrl><Point><coordinates>-14.8766135268885,11.30829072997679,0</coordinates></Point></Placemark></Document></kml>
